# Supplementary material for: Radon and thoron exhalation rate, emanation factor and radioactivity risks of building materials of the Iberian Peninsula
Source: PeerJ. 2020 Nov 12;8:e10331. doi: 10.7717/peerj.10331 (PMC7666814; doi:10.7717/peerj.10331)
Supplement: Supplemental Information 1 [file peerj-08-10331-s001.xlsx]

## Sheet: Table I
															Building materials		Nº of samples	CRa (Bq·kg-1)			ERn (x10-6 Bq·kg-1·s-1)			eRn (%)
Material	Name	aRa-226 (Bq·kg-1)	eRa-226 (Bq·kg-1)	EM/V (Bq·m-3)	eEM/V (Bq·m-3)	E (Bq·kg-1·h-1)	eE (Bq·kg-1·h-1)	E (x106 Bq·kg-1·s-1)	eE (x103 Bq·kg-1·s-1)	ԑ (%)	eԑ (%)							Mean	SD	Range	Mean	SD	Range	Mean	SD	Range
Concrete	Mortar resistance 5	11.3	1.3	1.06707	0.263772	0.00428275	0.00105866	1.18965	0.294072	5.01328	1.36688				NM	Concrete	9	26.97	31.7653	8.5 - 87.3	3.39751	2.41687	1.2 - 8.0	8.88355	6.6979	1.5 - 17.6
Concrete	Mortar resistance 7,5	7.55	0.8	1.34954	0.364217	0.0100549	0.00271363	2.79302	0.753787	17.616	5.10755					Cement	5	33.38	24.2159	21.5 - 76.6	5.05528	-	-	11.1966	-	-
Concrete	Conventional	14.55	1.85	2.84034	1.61447	0.0184241	0.00883218	5.11781	2.45338	16.7495	8.30703					Marble	2	22.805	25.3074	4.9 - 40.7	7.31333	-	-	8.5566	-	-
Concrete	High resitence	9	0.75	LD	LD											Slate	2	28.725	0.176777	28.6 - 28.9	4.45602	27.0626	2.9 - 6.0	7.39808	3.60029	4.9 - 9.9
Concrete	Self-compacting	8.5	2.2	LD	LD											Granite	9	122.233	52.9452	51.0 - 239.1	19.5279	19.8293	5.7 - 61.5	8.46226	8.67733	2.0 - 24.9
Concrete	Blast furnace slags	78	1.5	1.086	0.4	0.00863759	0.00318143	2.39933	0.883732	1.46479	0.540254					Ceramic	7	126.417	105.763	49.9 - 335.0	0.204356	-	-	0.195015	-	-
Concrete	Electrical furnace slags	15.7	2.1	1.70452	0.394873	0.00473924	0.0010979	1.31646	0.304974	3.99289	1.06812					Wood	1	-	-	-	-	-	-	-	-	-
Concrete	Betao 612	87.3	4.7	4.21562	0.855193	0.0288542	0.00585345	8.01505	1.62596	4.37193	0.917603					Aggregate	2	69.85	39.6687	41.8 - 97.9	45.1357	-	-	21.9542	-	-
Concrete	Betao MJ	10.83	0.9	2.65695	0.654669	0.0106244	0.00261784	2.95123	0.727179	12.9764	3.37433					Zircon	2	2069.35	14.425	48.7 - 4090.0	119.291	4.54812	10.0 - 228.6	6.23138	5.0492	2.7 - 9.8
Cement	White	21.6	2.7	LD	LD										PM	Gypsum	2	4.4	3.11127	2.2 - 6.6	1.36161	-	-	142.617	-	-
Cement	Glue	21.5	3.45	4.71513	3.35731	0.018199	0.0129582	5.05528	3.5995	11.1966	8.17227
Cement	Rapid	76.6	3.6	LD	LD
Cement	Type I Portland	21.8	1.1	LD	LD																							12.231	8.70073	1.2	8
Cement	II-Alhandra	25.4	1.5	LD	LD																							18.199	#VALUE!	5.1	6.6
Marble	Blanco Alconera	4.91	0.63	LD	LD																							16.0417	97.4254	2.9	6
Marble	Calcario	40.7	2	5.3075	1.86663	0.026328	0.00925948	7.31333	2.57208	8.5566	3.03857																	70.3005	71.3856	5.7	61.5
Slate	Villar del Rey	28.85	1.45	3.18836	0.854465	0.0105831	0.00283623	2.93976	0.787841	4.85229	1.32306																	0.735682
Slate	Xisto	28.6	2.2	4.9	1.5	0.0215002	0.0065817	5.97229	1.82825	9.94387	3.13867
Granite	Amarillo Jara	98	4.1	44.1	4	0.159281	0.0144472	44.2446	4.01311	21.4988	2.14745																	162.489
Granite	Azul Platino	92.1	4	5.61306	1.34467	0.0217708	0.00521542	6.04745	1.44873	3.12675	0.761256																	429.447	16.3732	10	228.6
Granite	Gran Beige	112.5	2.05	8.26202	1.601	0.0263656	0.00510908	7.32378	1.41919	3.10001	0.603366
Granite	Gris Quintana	96.5	2	6.53349	1.37565	0.0254455	0.00535766	7.0682	1.48824	3.48789	0.737938																			4.32	28.8
Granite	Rosa Alba	117.7	4.9	71.07	3.9	0.221287	0.0121432	61.4685	3.37311	24.8689	1.71298																			18.36	23.76
Granite	Silver Fantasy	135.8	5.7	6.26453	1.16547	0.0205869	0.00383005	5.71858	1.0639	2.00525	0.382441																			0	0
Granite	Granite-5	239.1	9.8	17.8326	3.69053	0.0621685	0.012866	17.269	3.57389	3.43929	0.725599																			10.44	21.6
Granite	Granite-8	51	2.4	9.23997	3.32728	0.0375455	0.01352	10.4293	3.75555	9.7379	3.5364																			20.52	221.4
Granite	Granito-Cylinder	157.4	6.5	11.4407	3.38747	0.0582541	0.0172485	16.1817	4.79124	4.89553	1.46355																			0	0
Ceramic	Tile 1	49.9	4.2	0.230903	0.149067	0.000735682	0.000474944	0.204356	0.131929	0.195015	0.126964																			0	0
Ceramic	Tile 2	-	-	LD	LD																									0	0
Ceramic	Uni Ouro - PP99	133.1	9.6	LD	LD																									36	822.96
Ceramic	Uni GELO - PG2	335	24	LD	LD
Ceramic	Uni Estanho - PG52	71.8	5.4	LD	LD
Ceramic	Uni Estanho - PC52	84.2	6.3	LD	LD
Ceramic	Tile 3	84.5	3.7	LD	LD
Wood	Wood	-	-	LD	LD
Aggregate	Arena de obra	97.9	4.25	49.625	4.01413	0.162489	0.0131436	45.1357	3.651	21.9542	2.01545
Aggregate	Tijolo	41.8	2	LD	LD
Zircon	Oxide	48.7	1.6	5.48869	1.08804	0.0360871	0.00715364	10.0242	1.98712	9.8017	1.96952
Zircon	Silacate	4090	189	154.828	5.70322	0.822808	0.0303089	228.558	8.41914	2.66105	0.157256
Plastic cement	Plastic cement	2.2	0.95	3.65617	1.36161	0.0237201	0.0088337	6.58892	2.45381	142.617	81.3243																	26.328
Gypsum	Gypsum	6.6	2.45	LD	LD

## Sheet: Risks
								CRn		EA		EP		Ia			Building materials		Nº of samples	ARn222 (Bq·m-3)			EA (mBq·m-2·h-1)			EP (mSv·y-1)			Ia (Bq·kg-1)
Material	Name	CRn (Bq·m-3)	EA (Bq·m-2·h-1)	EP (mSv·y-1)	DRn222 (mSv·y-1)	Ia (Bq·kg-1)		min	MAX	min	MAX	min	MAX	min	MAX					Mean	SD	Range	Mean	SD	Range	Mean	SD	Range	Mean	SD	Range
Concrete	Mortar resistance 5	0.170732	42.683	4.79356	4.30244	0.0565		0.170732	0.674499	42.683	168.625	4.79356	18.9376	0.03775	0.4365		NM	Concrete	9 (7)	0.34103	0.186384	0,17 - 0,67	85.2574	46.596	42,7 - 168,6	9.57494	5.23303	4,8 - 18,9	0.13485	0.158827	0,04 - 0,44
Concrete	Mortar resistance 7,5	0.215927	53.9816	6.06248	5.44135	0.03775		0.754422	0.754422	188.605	188.605	21.1816	21.1816	0.011	0.383			Cement	5 (1)	0.754422	-	-	188.605	-	-	21.1816	-	-	0.1437	0.140234	0,01 - 0,38
Concrete	Conventional	0.454455	113.614	12.7595	11.4523	0.07275		0.8492	0.8492	212.3	212.3	23.8426	23.8426	0.02455	0.2035			Marble	2 (1)	0.8492	-	0,85 - 0,85	212.3	-	-	23.8426	-	-	0.114025	0.126537	0,02 - 0,20
Concrete	High resitence					0.045		0.510137	0.784	127.534	196	14.3229	22.012	0.143	0.14425			Slate	2	0.647069	0.19365	0,51 - 0,78	161.767	48.4126	127,5 - 196.0	18.1675	5.43704	14,3 - 22.0	0.143625	0.000883883	0,14 - 0,14
Concrete	Self-compacting					0.0425		0.89809	11.3712	224.523	2842.8	25.2153	319.264	0.255	1.1955			Granite	9	3.20634	3.62103	0,90 - 11,37	801.584	905.257	224,5 - 2842,8	90.0229	101.666	25,2 - 319,3	0.611167	0.264726	0,26 - 1,20
Concrete	Blast furnace slags	0.17376	43.44	4.87858	4.37875	0.39		0.0369444	0.0369444	9.23611	9.23611	1.03727	1.03727	0.2495	1.675			Ceramic	7 (1)	0.0369444	-	-	9.23611	-	-	1.03727	-	-	0.632083	0.528813	0,25 - 1,68
Concrete	Electrical furnace slags	0.272723	68.1807	7.65712	6.87261	0.0785		0	0	0	0	0	0	0	0			Wood	1 (0)	-	-	-	-	-	-	-	-	-	-	-	-
Concrete	Betao 612	0.674499	168.625	18.9376	16.9974	0.4365		7.93999	7.93999	1985	1985	222.928	222.928	0.209	0.4895			Aggregate	2 (1)	7.93999	-	-	1985	-	-	222.928	-	-	0.34925	0.198343	0,21 - 0,49
Concrete	Betao MJ	0.425112	106.278	11.9357	10.7128	0.05415		0.87819	24.7724	219.548	6193.1	24.6566	695.524	0.2435	20.45			Zircon	2	12.8253	16.8958	0,88 - 24,77	3206.32	74.9238	219,5 - 6193,1	360.09	474.375	24,7 - 695,5	10.3468	14.2882	0,24 - 20,45
Cement	White					0.011		0.584987	0.584987	146.247	146.247	16.4244	16.4244	0.033	0.127		PM	Gypsum	2 (1)	0.584987	-	-	146.247	-	-	16.4244	-	-	0.08	0.066468	0,03 - 0,13
Cement	Glue	0.754422	188.605	21.1816	19.0114	0.108
Cement	Rapid					0.1075
Cement	Type I Portland					0.383
Cement	II-Alhandra					0.109
Marble	Blanco Alconera					0.02455
Marble	Calcario	0.8492	212.3	23.8426	21.3998	0.2035
Slate	Villar del Rey	0.510137	127.534	14.3229	12.8555	0.14425		Rounded
Slate	Xisto	0.784	196	22.012	19.7568	0.143		0.17	0.67	42.7	168.6	4.8	18.9	0.04	0.44
Granite	Amarillo Jara	7.056	1764	198.108	177.811	0.49		0.75	0.75	188.6	188.6	21.2	21.2	0.01	0.38
Granite	Azul Platino	0.89809	224.523	25.2153	22.6319	0.4605		0.85	0.85	212.3	212.3	23.8	23.8	0.02	0.2
Granite	Gran Beige	1.32192	330.481	37.1151	33.3125	0.5625		0.51	0.78	127.5	196	14.3	22	0.14	0.14
Granite	Gris Quintana	1.04536	261.34	29.3501	26.343	0.4825		0.9	11.37	224.5	2842.8	25.2	319.3	0.26	1.2
Granite	Rosa Alba	11.3712	2842.8	319.264	286.554	0.5885		0.04	0.04	9.2	9.2	1	1	0.25	1.68
Granite	Silver Fantasy	1.00232	250.581	28.1418	25.2586	0.679		0	0	0	0	0	0	0	0
Granite	Granite-5	2.85322	713.305	80.1086	71.9011	1.1955		7.94	7.94	1985	1985	222.9	222.9	0.21	0.49
Granite	Granite-8	1.4784	369.599	41.5083	37.2556	0.255		0.88	24.77	219.5	6193.1	24.7	695.5	0.24	20.45
Granite	Granito-Cylinder	1.83051	457.627	51.3944	46.1288	0.787		0.58	0.58	146.2	146.2	16.4	16.4	0.03	0.13
Ceramic	Tile 1					0.4225
Ceramic	Tile 2	0.0369444	9.23611	1.03727	0.930999	0.2495
Ceramic	Uni Ouro - PP99					-
Ceramic	Uni GELO - PG2					0.6655
Ceramic	Uni Estanho - PG52					1.675
Ceramic	Uni Estanho - PC52					0.359
Ceramic	Tile 3					0.421
Wood	Wood					-
Aggregate	Arena de obra	7.93999	1985	222.928	200.088	0.4895
Aggregate	Tijolo					0.209
Zircon	Oxide	0.87819	219.548	24.6566	22.1304	0.2435
Zircon	Silacate	24.7724	6193.1	695.524	624.265	20.45
Plastic cement	Plastic cement	0.584987	146.247	16.4244	14.7417	0.127
Gypsum	Gypsum					0.033

## Sheet: Risks dose
								DRn222			Building materials		DRn222 (mSv·y-1)
Material	Name	CRn (Bq·m-3)	EA (Bq·m-2·h-1)	EP (mSv·y-1)	DRn222 (mSv·y-1)	Ia (Bq·kg-1)		min	MAX				Mean	SD	Range
Concrete	Mortar resistance 5	0.170732	42.683	4.79356	4.30244	0.0565		4.30244	16.9974		NM	Concrete	8.59395	4.69688	4,3 - 17
Concrete	Mortar resistance 7,5	0.215927	53.9816	6.06248	5.44135	0.03775		19.0114	19.0114			Cement	19.0114	-	-
Concrete	Conventional	0.454455	113.614	12.7595	11.4523	0.07275		21.3998	21.3998			Marble	21.3998	-	-
Concrete	High resitence					0.045		12.8555	19.7568			Slate	16.3061	4.87999	12,9 - 19,8
Concrete	Self-compacting					0.0425		22.6319	286.554			Granite	80.7997	91.2499	22,6 - 286,6
Concrete	Blast furnace slags	0.17376	43.44	4.87858	4.37875	0.39		0.930999	0.930999			Ceramic	0.930999	-	-
Concrete	Electrical furnace slags	0.272723	68.1807	7.65712	6.87261	0.0785		0	0			Wood	-	-	-
Concrete	Betao 612	0.674499	168.625	18.9376	16.9974	0.4365		200.088	200.088			Aggregate	200.088	-	-
Concrete	Betao MJ	0.425112	106.278	11.9357	10.7128	0.05415		22.1304	624.265			Zircon	323.198	425.773	22,1 - 624,3
Cement	White					0.011		14.7417	14.7417		PM	Gypsum	14.7417	-	-
Cement	Glue	0.754422	188.605	21.1816	19.0114	0.108
Cement	Rapid					0.1075
Cement	Type I Portland					0.383
Cement	II-Alhandra					0.109
Marble	Blanco Alconera					0.02455
Marble	Calcario	0.8492	212.3	23.8426	21.3998	0.2035
Slate	Villar del Rey	0.510137	127.534	14.3229	12.8555	0.14425		Rounded
Slate	Xisto	0.784	196	22.012	19.7568	0.143		4.3	17
Granite	Amarillo Jara	7.056	1764	198.108	177.811	0.49		19	19
Granite	Azul Platino	0.89809	224.523	25.2153	22.6319	0.4605		21.4	21.4
Granite	Gran Beige	1.32192	330.481	37.1151	33.3125	0.5625		12.9	19.8
Granite	Gris Quintana	1.04536	261.34	29.3501	26.343	0.4825		22.6	286.6
Granite	Rosa Alba	11.3712	2842.8	319.264	286.554	0.5885		0.9	0.9
Granite	Silver Fantasy	1.00232	250.581	28.1418	25.2586	0.679		0	0
Granite	Granite-5	2.85322	713.305	80.1086	71.9011	1.1955		200.1	200.1
Granite	Granite-8	1.4784	369.599	41.5083	37.2556	0.255		22.1	624.3
Granite	Granito-Cylinder	1.83051	457.627	51.3944	46.1288	0.787		14.7	14.7
Ceramic	Tile 1					0.4225
Ceramic	Tile 2	0.0369444	9.23611	1.03727	0.930999	0.2495
Ceramic	Uni Ouro - PP99					-
Ceramic	Uni GELO - PG2					0.6655
Ceramic	Uni Estanho - PG52					1.675
Ceramic	Uni Estanho - PC52					0.359
Ceramic	Tile 3					0.421
Wood	Wood					-
Aggregate	Arena de obra	7.93999	1985	222.928	200.088	0.4895
Aggregate	Tijolo					0.209
Zircon	Oxide	0.87819	219.548	24.6566	22.1304	0.2435
Zircon	Silacate	24.7724	6193.1	695.524	624.265	20.45
Plastic cement	Plastic cement	0.584987	146.247	16.4244	14.7417	0.127
Gypsum	Gypsum					0.033
