# Supplementary material for: Radon and thoron exhalation rate, emanation factor and radioactivity risks of building materials of the Iberian Peninsula
Source: PeerJ. 2020 Nov 12;8:e10331. doi: 10.7717/peerj.10331 (PMC7666814; doi:10.7717/peerj.10331)
Supplement: Supplemental Information 2 [file peerj-08-10331-s002.xlsx]

## Sheet: Table
						C		E		e			Building materials		Nº of samples	CTh (Bq·kg-1)			ERn (Bq·kg-1·h-1)			eRn (%)
Material	Name	aTh-232 (Bq·kg-1)	E (Bq·kg-1·h-1)	ԑ (%)		min	MAX	min	MAX	min	MAX					Mean	SD	Range	Mean	SD	Range	Mean	SD	Range
Concrete	Mortar resistance 5	12.5	5.97305	1.06638		3.85	35.3	1.90127	10.06	0.635985	2.12642		NM	Concrete	9	13.9656	9.8056	3,9 - 35,3	6.28884	2.40537	1,9 - 10,1	1.22131	0.553597	0,6 - 2,1
Concrete	Mortar resistance 7,5	11.75	7.01108	1.3316		4.1	14.35	1.74284	5.3724	0.405145	1.47564			Cement	5	10.83	4.18862	4,1 - 14,35	3.40833	1.34222	1,7 - 5,4	0.790582	0.412426	0,4 - 1,5
Concrete	Conventional	9.5	5.8548	1.37535		1.85	3.9	3.30197	3.7913	2.16945	3.98314			Marble	2	2.875	1.44957	1,85 - 3,9	3.54663	0.346014	3,3 - 3,8	3.07629	1.28248	2,2 - 4.0
Concrete	High resitence	13.25	6.40594	1.07893		70.9	75	19.5905	20.9641	0.582919	0.659864			Slate	2	72.95	2.89914	70,9 - 75	20.2773	2.74961	19,6 - 21	0.621392	0.0544082	0,6 - 0,7
Concrete	Self-compacting	3.85	3.66846	2.12642		10.1	124	2.607	144.091	0.191848	4.83548			Granite	9	50.7222	32.7314	10,1 - 124	31.0069	46.209	2,6 - 144,1	1.11332	1.43129	0,2 - 4,8
Concrete	Blast furnace slags	24.1	7.56951	0.700932		3.1	79.7	1.48476	5.83775	0.0459564	1.11397			Ceramic	7	42.7214	27.2628	3,1 - 79,7	2.2374	1.60742	1,5 - 5,8	0.255336	0.381601	0.0 - 1,1
Concrete	Electrical furnace slags	6.4	1.90127	0.662964		0.6	0.6	78.4753	78.4753	29.1183	29.1183			Wood	1	0.6	-	-	78.4753	-	-	29.1183	-	-
Concrete	Betao 612	35.3	10.06	0.635985		41.25	53.8	7.82876	12.9297	0.536329	4.24555			Aggregate	2	47.525	29.7423	41,25 - 53,8	10.3792	3.60691	7,8 - 12,9	2.39094	2.62282	0,5 - 4,2
Concrete	Betao MJ	9.04	8.15546	2.01328		1.6	676	6.89195	330.225	1.09015	9.61273			Zircon	2	338.8	21.496	1,6 - 676.0	168.558	228.631	6,9 - 330,2	5.35144	6.02637	1,1 - 9,6
Cement	White	4.1	2.71105	1.47564		1.1	1.4	2.5225	2.92719	4.02094	5.93858		PM	Gypsum	2	1.4	0.212132	1,1 - 1,4	2.72484	0.286158	2,5 - 2,9	4.97976	1.35598	4 - 5,9
Cement	Glue	9.6	1.74284	0.405145
Cement	Rapid	12.3	3.54026	0.642325
Cement	Type I Portland	14.35	5.3724	0.83549
Cement	II-Alhandra	13.8	3.67509	0.594311
Marble	Blanco Alconera	1.85	3.30197	3.98314
Marble	Calcario	3.9	3.7913	2.16945
Slate	Villar del Rey	75	19.5905	0.582919
Slate	Xisto	70.9	20.9641	0.659864
Granite	Amarillo Jara	48	24.8526	1.15546
Granite	Azul Platino	10.1	2.607	0.57603
Granite	Gran Beige	40.5	3.48166	0.191848
Granite	Gris Quintana	66.5	144.091	4.83548
Granite	Rosa Alba	36.1	8.89455	0.549847		Rounded
Granite	Silver Fantasy	20.3	3.45951	0.380315		3.9	35.3	1.9	10.1	0.6	2.1
Granite	Granite-5	57.1	12.1003	0.472916		4.1	14.4	1.7	5.4	0.4	1.5
Granite	Granite-8	53.9	18.1928	0.753245		1.9	3.9	3.3	3.8	2.2	4
Granite	Granito-Cylinder	124	61.3829	1.10472		70.9	75	19.6	21	0.6	0.7
Ceramic	Tile 1	79.7	5.83775	0.16346		10.1	124	2.6	144.1	0.2	4.8
Ceramic	Tile 2	53.15	1.51481	0.0636034		3.1	79.7	1.5	5.8	0	1.1
Ceramic	Uni Ouro - PP99	3.1	1.54743	1.11397		0.6	0.6	78.5	78.5	29.1	29.1
Ceramic	Uni GELO - PG2	37.5	1.55932	0.0927961		41.3	53.8	7.8	12.9	0.5	4.2
Ceramic	Uni Estanho - PG52	72.1	1.48476	0.0459564		1.6	676	6.9	330.2	1.1	9.6
Ceramic	Uni Estanho - PC52	24.2	1.52035	0.140201		1.1	1.4	2.5	2.9	4	5.9
Ceramic	Tile 3	29.3	2.19735	0.167362
Wood	Wood	0.6	78.4753	29.1183
Aggregate	Arena de obra	41.25	12.9297	4.24555
Aggregate	Tijolo	53.8	7.82876	0.536329
Zircon	Oxide	1.6	6.89195	9.61273
Zircon	Silacate	676	330.225	1.09015
Plastic cement	Plastic cement	1.1	2.92719	5.93858
Gypsum	Gypsum	1.4	2.5225	4.02094

## Sheet: Risks
								CTn		EA		EP		Ia			Building materials		Nº of samp.	ARn220 (Bq·m-3)			EA (Bq·m-2·h-1)			DRn222 (mSv·y-1)			EP (mSv·y-1)			Ia (Bq·kg-1)
Material	Name	CTn Z (Bq·m-3)	EA (Bq·m-2·h-1)	EP (mSv·y-1)	DRn220 (mSv·y-1)	Ia (Bq·kg-1)		min	MAX	min	MAX	min	MAX	min	MAX					Mean	SD	Range	Mean	SD	Range	Mean	SD	Range	Mean	SD	Range	Mean	SD	Range
Concrete	Mortar resistance 5	5.26368	59.5289	1.67137	1.50013	0.0625		2.31071	7.21353	26.1327	81.5806	0.733716	2.2905	0.01925	0.1765		NM	Concrete	9	3.92785	1.62244	2,3 - 7,2	44.4215	18.3487	26,1 - 81,6	1.2472	0.51517	0.7 - 2.1	1.2472	0.51517	0,7 - 2,3	0.0698278	0.049028	0,02 - 0,18
Concrete	Mortar resistance 7,5	3.32824	37.6404	1.05681	0.948538	0.05875		1.59707	2.86788	18.0476	32.4339	0.506715	0.910633	0.0055	0.07175			Cement	5	2.01725	0.497286	1,6 - 2,9	21.986	6.02941	18.0 - 32,4	0.554048	0.151941	0.5 - 0.8	0.617292	0.169285	0,5 - 0,9	0.04145	0.024924	0,01 - 0,07
Concrete	Conventional	3.1924	36.1041	1.01368	0.909822	0.0475		2.12236	2.70322	24.0026	30.5718	0.67391	0.858351	0.00925	0.0195			Marble	2	2.41279	0.410732	2,1 - 2,7	27.2872	4.64513	24.0 - 30,6	0.76613	0.130419	0.6 - 0.8	0.76613	0.130419	0,7 - 0,9	0.014375	0.00724784	0,01 - 0,02
Concrete	High resitence	3.05901	34.5955	0.971322	0.871806	0.06625		16.8986	20.8746	191.112	236.079	5.36578	6.62829	0.3545	0.375			Slate	2	18.8866	2.8115	16,9 - 20,9	213.596	31.7963	191,1 - 236,1	5.99703	1.67015	4.8 - 5.9	5.99703	1.67015	5,4 - 6,6	0.36475	0.0144957	0,35 - 0,38
Concrete	Self-compacting	2.31071	26.1327	0.733716	0.658543	0.01925		2.37732	135.292	26.886	1530.07	0.754867	42.959	0.0505	0.62			Granite	9	27.8268	42.2539	2,4 - 135,3	314.704	477.865	26,9 - 1530,1	8.83582	13.4168	0.8 - 43	8.83582	13.4168	0,8 - 43	0.253611	0.163657	0,05 - 0,62
Concrete	Blast furnace slags	3.36609	38.0684	1.06883	0.959325	0.1205		1.53645	4.71222	17.3763	53.2923	0.487867	53.2923	0.0155	0.3985			Ceramic	7	2.13277	1.14085	1,5 - 4,7	24.1203	12.9023	17,4 - 53,3	0.677216	0.362254	0.5 - 53.3	0.677216	0.362254	0,5 - 53,3	0.213607	0.136314	0,02 - 0,40
Concrete	Electrical furnace slags	2.41857	27.3525	0.767965	0.689283	0.032		84.7679	84.7679	958.673	958.673	26.9162	26.9162	0.20625	0.20625			Wood	1	84.7679	-	-	958.673	-	-	26.9162	0	-	26.9162	-	-	0.20625	-	-
Concrete	Betao 612	5.1984	58.7907	1.65064	1.48153	0.1765		1.29898	7.09617	14.6907	80.2533	0.412463	2.25324	0.003	0.269			Aggregate	2	4.19757	4.09923	1,3 - 7,1	47.472	109.18	14,7 - 80,3	1.33285	1.30162	0.4 - 2.3	1.33285	1.30162	0,4 - 2,3	0.136	0.18809	0.00 - 0,27
Concrete	Betao MJ	7.21353	81.5806	2.2905	2.05583	0.0452		3.70748	219.776	41.9294	2485.53	1.17723	69.7852	0.008	3.38			Zircon	2	111.742	152.784	3,7 - 219,8	1263.73	1727.89	41,9 - 2485,5	35.4812	48.5132	1.2 - 69.8	35.4812	48.5132	1,2 - 69,8	1.694	2.38436	0,01 - 3,38
Cement	White	1.74122	18.0476	0.506715	0.4548	0.0055		1.21914	1.59581	13.7877	22.187	0.387111	0.622935	0.007	0.069		PM	Gypsum	2	1.40747	0.266347	1,2 - 1,6	17.9873	5.93921	13,8 - 22,2	0.453281	0.149668	0.3 - 0.6	0.505023	0.166753	0,4 - 0,6	0.038	0.0438406	0,01 - 0,07
Cement	Glue	1.59707	19.6922	0.552889	0.496243	0.0205
Cement	Rapid	1.91828	18.0619	0.507115	0.455159	0.048
Cement	Type I Portland	2.86788	21.6945	0.609108	0.546702	0.0615
Cement	II-Alhandra	1.96182	32.4339	0.910633	0.817334	0.07175
Marble	Blanco Alconera	2.12236	24.0026	0.67391	0.604865	0.00925
Marble	Calcario	2.70322	30.5718	0.858351	0.770409	0.0195
Slate	Villar del Rey	20.8746	236.079	6.62829	5.94919	0.375
Slate	Xisto	16.8986	191.112	5.36578	4.81603	0.3545
Granite	Amarillo Jara	24.3371	275.238	7.72773	6.93599	0.24
Granite	Azul Platino	2.37732	26.886	0.754867	0.677527	0.0505
Granite	Gran Beige	3.85883	43.641	1.22529	1.09975	0.2025		Rounded
Granite	Gris Quintana	135.292	1530.07	42.959	38.5577	0.3325		2.3	7.2	26.1	81.6	0.7	2.3	0.02	0.18
Granite	Rosa Alba	10.1036	114.266	3.20818	2.87949	0.1805		1.6	2.9	18	32.4	0.5	0.9	0.01	0.07
Granite	Silver Fantasy	3.72335	42.1088	1.18227	1.06114	0.1015		2.1	2.7	24	30.6	0.7	0.9	0.01	0.02
Granite	Granite-5	12.2761	138.835	3.89802	3.49865	0.2855		16.9	20.9	191.1	236.1	5.4	6.6	0.35	0.38
Granite	Granite-8	15.8356	179.091	5.02825	4.51308	0.2695		2.4	135.3	26.9	1530.1	0.8	43	0.05	0.62
Granite	Granito-Cylinder	42.6377	482.206	13.5387	12.1516	0.62		1.5	4.7	17.4	53.3	0.5	53.3	0.02	0.4
Ceramic	Tile 1	4.71222	53.2923	1.49627	1.34297	0.3985		84.8	84.8	958.7	958.7	26.9	26.9	0.21	0.21
Ceramic	Tile 2	1.68158	19.0177	0.533951	0.479245	0.26575		1.3	7.1	14.7	80.3	0.4	2.3	0	0.27
Ceramic	Uni Ouro - PP99	1.70435	19.2752	0.541181	0.485735	0.0155		3.7	219.8	41.9	2485.5	1.2	69.8	0.01	3.38
Ceramic	Uni GELO - PG2	1.74641	19.7509	0.554537	0.497722	0.1875		1.2	1.6	13.8	22.2	0.4	0.6	0.01	0.07
Ceramic	Uni Estanho - PG52	1.71695	19.4177	0.545181	0.489325	0.3605
Ceramic	Uni Estanho - PC52	1.53645	17.3763	0.487867	0.437883	0.121
Ceramic	Tile 3	1.83142	20.7122	0.581527	0.521947	0.1465
Wood	Wood	84.7679	958.673	26.9162	24.1585	0.20625
Aggregate	Arena de obra	7.09617	80.2533	2.25324	2.02238	0.269																														Hormigón (9)
Aggregate	Tijolo	1.29898	14.6907	0.412463	0.370204	0.003																														Cemento (5)
Zircon	Oxide	3.70748	41.9294	1.17723	1.05662	0.008																														Mármol (2)
Zircon	Silacate	219.776	2485.53	69.7852	62.6354	3.38																														Pizarra (2)
Plastic cement	Plastic cement	1.59581	22.187	0.622935	0.559113	0.069																														Granito (9)
Gypsum	Gypsum	1.21914	13.7877	0.387111	0.34745	0.007																														Cerámica (7)
																																				Madera (1)
																																				Agregado (2)
																																				Circonio (2)
																																				Yeso (2)
