# Supplementary material for: Radon and thoron exhalation rate, emanation factor and radioactivity risks of building materials of the Iberian Peninsula
Source: PeerJ. 2020 Nov 12;8:e10331. doi: 10.7717/peerj.10331 (PMC7666814; doi:10.7717/peerj.10331)
Supplement: Supplemental Information 3 [file peerj-08-10331-s003.xlsx]

## Sheet: Raw data
Material	Name	Code	Tipo	Origen	Mass (Kg)	aRa-226 (Bq·kg-1)	eRa-226 (Bq·kg-1)	EM/V (Bq·m-3)	eEM/V (Bq·m-3)	E (Bq·kg-1·h-1)	E (mBq·kg-1·h-1)	eE (Bq·kg-1·h-1)	E (x106 Bq·kg-1·s-1)	eE (x106 Bq·kg-1·s-1)	ԑ (%)	eԑ (%)	ԑ (Tn) (%)	eԑ (Tn) (%)	d (kg·m-3)	EA (x103 Bq·m-2·h-1)	CRn (Bq·m-3)	EP (mSv·y-1)	Ia (Bq·kg-1)			l (h-1)	Volume (m3)	n	F	T (h·y-1)	lv (h-1)	S/V (m-1)	CF (mSv (WLM)-1)
Concrete	Mortar resistance 5	MOR5	Concrete	España	0.46966	11.3	1.3	1.06707	0.263772	0.00428275	4.28275	0.00105866	1.18965	0.294072	5.01328	1.36688	1.06638	0.383927	249.156	42.683	0.170732	4.79356	0.0565			0.00756	0.001885	0.8	0.4	8760	0.5	2	6.3
Concrete	Mortar resistance 7,5	MOR7	Concrete	España	0.253	7.55	0.8	1.34954	0.364217	0.0100549	10.0549	0.00271363	2.79302	0.753787	17.616	5.10755	1.3316	0.54951	134.218	53.9816	0.215927	6.06248	0.03775
Concrete	Conventional	HC	Concrete	España	0.2906	14.55	1.85	2.84034	1.61447	0.0184241	18.4241	0.026038	5.11781	7.23277	16.7495	23.7669	1.37535	0.656481	154.164	113.614	0.454455	12.7595	0.07275				NA data
Concrete	High resitence	HAR	Concrete	España	0.2545
Concrete	Self-compacting	HAC	Concrete	España	0.3357
Concrete	Blast furnace slags	HHA100	Concrete	España	0.237	78	1.5	1.086	0.4	0.00863759	8.63759	0.00318143	2.39933	0.883732	1.46479	0.540254	0.700932	0.241475	125.729	43.44	0.17376	4.87858	0.39
Concrete	Electrical furnace slags	HHE100	Concrete	España	0.67796	15.7	2.1	1.70452	0.394873	0.00473924	4.73924	0.0010979	1.31646	0.304974	3.99289	1.06812	0.662964	0.332971	359.66	68.1807	0.272723	7.65712	0.0785
Concrete	Betao 612	BET	Concrete	Portugal	0.2754	87.3	4.7	4.21562	0.855193	0.0288542	28.8542	0.00585345	8.01505	1.62596	4.37193	0.917603	0.635985	0.229622	146.101	168.625	0.674499	18.9376	0.4365
Concrete	Betao MJ	BMJ	Concrete	Portugal	0.4714	10.83	0.9	2.65695	0.654669	0.0106244	10.6244	0.00261784	2.95123	0.727179	12.9764	3.37433	2.01328	0.515607	250.08	106.278	0.425112	11.9357	0.05415
Cement	White	CEBA	Cement	España	0.3423
Cement	Glue	CECO	Cement	España	0.48838	21.5	3.45	4.71513	3.35731	0.018199	18.199	0.0129582	5.05528	3.5995	11.1966	8.17227	0.405145	0.196523	259.088	188.605	0.754422	21.1816	0.1075
Cement	Rapid	CERA	Cement	España	0.28878
Cement	Type I Portland	CEMI	Cement	España	0.2845
Cement	II-Alhandra	CIIA	Cement	Portugal	0.2845
Marble	Blanco Alconera	BA	Marble	España	0.34256
Marble	Calcario	CAL	Marble	Portugal	0.38	40.7	2	5.3075	1.86663	0.026328	26.328	0.00925948	7.31333	2.57208	8.5566	3.03857	2.16945	1.13417	201.592	212.3	0.8492	23.8426	0.2035
Slate	Villar del Rey	PVR	Slate	España	0.56789	28.85	1.45	3.18836	0.854465	0.0105831	10.5831	0.00283623	2.93976	0.787841	4.85229	1.32306	0.582919	0.103997	301.268	127.534	0.510137	14.3229	0.14425
Slate	Xisto	XIS	Slate	Portugal	0.4296	28.6	2.2	4.9	1.5	0.0215002	21.5002	0.0065817	5.97229	1.82825	9.94387	3.13867	0.659864	0.123206	227.905	196	0.784	22.012	0.143
Granite	Amarillo Jara	AJ	Granite	España	0.5219	98	4.1	44.1	4	0.159281		0.0144472	44.2446	4.01311	21.4988	2.14745	1.15546	0.189865	276.87	1764	7.056	198.108	0.49
Granite	Azul Platino	AP	Granite	España	0.486	92.1	4	5.61306	1.34467	0.0217708	21.7708	0.00521542	6.04745	1.44873	3.12675	0.761256	0.57603	0.221605	257.825	224.523	0.89809	25.2153	0.4605
Granite	Gran Beige	GB	Granite	España	0.59069	112.5	2.05	8.26202	1.601	0.0263656	26.3656	0.00510908	7.32378	1.41919	3.10001	0.603366	0.191848	0.0697504	313.363	330.481	1.32192	37.1151	0.5625
Granite	Gris Quintana	GQ	Granite	España	0.484	96.5	2	6.53349	1.37565	0.0254455	25.4455	0.00535766	7.0682	1.48824	3.48789	0.737938	4.83548	0.322649	256.764	261.34	1.04536	29.3501	0.4825
Granite	Rosa Alba	RA	Granite	España	0.6054	117.7	4.9	71.07	3.9	0.221287		0.0121432	61.4685	3.37311	24.8689	1.71298	0.549847	0.174045	321.167	2842.8	11.3712	319.264	0.5885
Granite	Silver Fantasy	SF	Granite	España	0.5736	135.8	5.7	6.26453	1.16547	0.0205869	20.5869	0.00383005	5.71858	1.0639	2.00525	0.382441	0.380315	0.144503	304.297	250.581	1.00232	28.1418	0.679
Granite	Granite-5	GRA5	Granite	Portugal	0.5407	239.1	9.8	17.8326	3.69053	0.0621685	62.1685	0.012866	17.269	3.57389	3.43929	0.725599	0.472916	0.105468	286.844	713.305	2.85322	80.1086	1.1955
Granite	Granite-8	GRA8	Granite	Portugal	0.4639	51	2.4	9.23997	3.32728	0.0375455	37.5455	0.01352	10.4293	3.75555	9.7379	3.5364	0.753245	0.17661	246.101	369.599	1.4784	41.5083	0.255
Granite	Granito-Cylinder	GRAC	Granite	Portugal	0.3702	157.4	6.5	11.4407	3.38747	0.0582541	58.2541	0.0172485	16.1817	4.79124	4.89553	1.46355	1.10472	0.147232	196.393	457.627	1.83051	51.3944	0.787
Ceramic	Tile 1	AZLC	Ceramic	España	0.4302
Ceramic	Tile 2	CER1	Ceramic	España	0.59163	49.9	4.2	0.230903	0.149067	0.000735682	0.735682	0.000474944	0.204356	0.131929	0.195015	0.126964	0.0636034	0.0277416	313.862	9.23611	0.0369444	1.03727	0.2495
Ceramic	Uni Ouro - PP99	CER6	Ceramic	España	0.587
Ceramic	Uni GELO - PG2	PP99	Ceramic	Portugal
Ceramic	Uni Estanho - PG52	PG2	Ceramic	Portugal
Ceramic	Uni Estanho - PC52	PG52	Ceramic	Portugal																							Legend
Ceramic	Tile 3	PC52	Ceramic	Portugal																							E	Exhalation				Ia	Alpha index (not used)
Wood	Wood	CORE	Wood	España	0.08843																						e	Emanation
Aggregate	Arena de obra	ARE	Aggregate	España	0.57569	97.9	4.25	49.625	4.01413	0.162489		0.0131436	45.1357	3.651	21.9542	2.01545	4.24555	0.415522	305.406	1985	7.93999	222.928	0.4895				eE	Exhalation error
Aggregate	Tijolo	TIJ	Aggregate	Portugal	0.2925																						aRa	Ra-226 activity
Zircon	Oxide	CO	Zircon	Portugal	0.2867	48.7	1.6	5.48869	1.08804	0.0360871	36.0871	0.00715364	10.0242	1.98712	9.8017	1.96952	9.61273	53.0108	152.095	219.548	0.87819	24.6566	0.2435				eRa	Ra-226 error
Zircon	Silacate	CS	Zircon	Portugal	0.3547	4090	189	154.828	5.70322	0.822808	822.808	0.0303089	228.558	8.41914	2.66105	0.157256	1.09015	0.103662	188.17	6193.1	24.7724	695.524	20.45				d	density
Plastic cement	Plastic cement	AGPLA	Cement	España	0.29055	2.2	0.95	3.65617	1.36161	0.0237201	23.7201	0.0088337	6.58892	2.45381	142.617	81.3243	5.93858	6.36066	154.138	146.247	0.584987	16.4244	0.011				CRn	Radon concentration
Gypsum	Gypsum	YESO	Gypsum	España	0.25758
	Amarillo Jara	AJ	Granite	España	0.5219	98	4.1	44.1	4	0.159281	159.281
	Rosa Alba	RA	Granite	España	0.6054	117.7	4.9	71.07	3.9	0.221287	221.287
	Arena de obra	ARE	Aggregate	España	0.57569	97.9	4.25	49.625	4.01413	0.162489	162.489
