# Supplementary material for: Radon and thoron exhalation rate, emanation factor and radioactivity risks of building materials of the Iberian Peninsula
Source: PeerJ. 2020 Nov 12;8:e10331. doi: 10.7717/peerj.10331 (PMC7666814; doi:10.7717/peerj.10331)
Supplement: Supplemental Information 4 [file peerj-08-10331-s004.xlsx]

## Sheet: Graphs
Material	Name	Code	Tipo	Origen	Mass (Kg)	aTh-232 (Bq·kg-1)	eTh-232 (Bq·kg-1)	<CTn> (Bq·m-3)	<eCTn> (%)	sdCTn (Bq·m-3)	E (Bq·kg-1·h-1)	sdE (Bq·kg-1·h-1)	E (x103 Bq·kg-1·s-1)	sdE (x103 Bq·kg-1·s-1)	ԑ (%)	eԑ (%)	d (kg·m-3)	EA (Bq·m-2·h-1)	EA (Bq·m-2·h-1)	CTn (ATn) (Bq·m-3)	CTn (Z) (Bq·m-3)	EP (mSv·y-1)	DRn220 (mSv·y-1)	DRn220CZ (mSv·y-1)	Ia (Bq·kg-1)		l (h-1)	Volume (m3)	n	F	T (h·y-1)	lv (h-1)	S/V (m-1)	CF (mSv (WLM)-1)	Ta (h·y-1)	CFRn222 (Sv Bq·h·m-3)	Deff (m2 h-1)	Z (m)
Concrete	Mortar resistance 5	MOR5	Concrete	España	0.46966	12.5	2	33.2119	34.3856	10.7116	5.97305	1.92644	1.65918	0.535123	1.06638	0.383927	249.156	59.5289	59.5289	238.116	5.26368	1.67137	6.66724	147.383	0.0625		44.81	0.001885	0.8	0.1	8760	0.5	2	6.3	7000	4e-08	1.944	0.04
Concrete	Mortar resistance 7,5	MOR7	Concrete	España	0.253	11.75	0.7	21	45.4214	8.5753	7.01108	2.86296	1.94752	0.795266	1.3316	0.54951	134.218	37.6404	37.6404	150.562	3.32824	1.05681	4.21572	38.834	0.05875										2917
Concrete	Conventional	HC	Concrete	España	0.2906	9.5	1.2	20.1429	48.5714	9.27179	5.8548	2.69497	1.62633	0.748604	1.37535	0.656481	154.164	36.1041	36.1041	144.416	3.1924	1.01368	4.04365	37.2489	0.0475
Concrete	High resitence	HAR	Concrete	España	0.2545	13.25	0.7	19.3012	48.2169	7.65209	6.40594	2.53968	1.77943	0.705466	1.07893	0.431529	135.013	34.5955	34.5955	138.382	3.05901	0.971322	3.87469	35.6925	0.06625
Concrete	Self-compacting	HAC	Concrete	España	0.3357	3.85	1.4	14.5797	57.3913	6.82859	3.66846	1.71817	1.01902	0.477269	2.12642	1.26087	178.09	26.1327	26.1327	104.531	2.31071	0.733716	2.92686	26.9613	0.01925
Concrete	Blast furnace slags	HHA100	Concrete	España	0.237	24.1	2.4	21.2388	46.8955	7.00452	7.56951	2.49641	2.10264	0.693448	0.700932	0.241475	125.729	38.0684	38.0684	152.274	3.36609	1.06883	4.26366	39.2756	0.1205
Concrete	Electrical furnace slags	HHE100	Concrete	España	0.67796	6.4	1.2	15.2603	56.7671	7.1103	1.90127	0.88587	0.528131	0.246075	0.662964	0.332971	359.66	27.3525	27.3525	109.41	2.41857	0.767965	3.06348	28.2199	0.032
Concrete	Betao 612	BET	Concrete	Portugal	0.2754	35.3	2.9	32.8	36.1778	11.5318	10.06	3.53687	2.79443	0.982463	0.635985	0.229622	146.101	58.7907	58.7907	235.163	5.1984	1.65064	6.58456	60.6549	0.1765
Concrete	Betao MJ	BMJ	Concrete	Portugal	0.4714	9.04	0.72	45.5147	28.5	11.0784	8.15546	1.98506	2.26541	0.551406	2.01328	0.515607	250.08	81.5806	81.5806	326.322	7.21353	2.2905	9.13702	84.1674	0.0452
Cement	White	CEBA	Cement	España	0.3423	4.1	1.4	10.9865	62.7162	4.76141	2.71105	1.17494	0.753071	0.326372	1.47564	0.814175	181.592	19.6922	19.6922	78.7687	1.74122	0.552889	2.20552	20.3166	0.0205
Cement	Glue	CECO	Cement	España	0.48838	9.6	1.9	10.0769	64.4103	4.46262	1.74284	0.771824	0.484121	0.214396	0.405145	0.196523	259.088	18.0619	18.0619	72.2475	1.59707	0.507115	2.02293	18.6346	0.048
Cement	Rapid	CERA	Cement	España	0.28878	12.3	1.15	12.1036	58.6477	5.38029	3.54026	1.57371	0.983405	0.437142	0.642325	0.291773	153.199	21.6945	21.6945	86.7782	1.91828	0.609108	2.42979	22.3825	0.0615
Cement	Type I Portland	CEMI	Cement	España	0.2845	14.35	0.8	18.0952	50.6667	6.67288	5.3724	1.98115	1.49233	0.550319	0.83549	0.3116	150.928	32.4339	32.4339	129.736	2.86788	0.910633	3.6326	33.4624	0.07175
Cement	II-Alhandra	CIIA	Cement	Portugal	0.2845	13.8	2.7	12.3784	63.4595	4.93486	3.67509	1.46514	1.02086	0.406983	0.594311	0.263927	150.928	22.187	22.187	88.748	1.96182	0.622935	2.48494	22.8905	0.069
Marble	Blanco Alconera	BA	Marble	España	0.34256	1.85	1	13.3913	55.6087	6.67927	3.30197	1.64694	0.917213	0.457484	3.98314	2.92961	181.729	24.0026	24.0026	96.0103	2.12236	0.67391	2.68829	24.7637	0.00925
Marble	Calcario	CAL	Marble	Portugal	0.38	3.9	1.1	17.0563	52.9859	7.50788	3.7913	1.66886	1.05314	0.463572	2.16945	1.13417	201.592	30.5718	30.5718	122.287	2.70322	0.858351	3.42404	31.5412	0.0195
Slate	Villar del Rey	PVR	Slate	España	0.56789	75	1.95	131.711	15.2222	23.2473	19.5905	3.45776	5.44179	0.960489	0.582919	0.103997	301.268	236.079	236.079	944.316	20.8746	6.62829	26.4408	243.565	0.375
Slate	Xisto	XIS	Slate	Portugal	0.4296	70.9	3.5	106.624	17.9247	19.1997	20.9641	3.775	5.82335	1.04861	0.659864	0.123206	227.905	191.112	191.112	764.449	16.8986	5.36578	21.4046	197.172	0.3545
Granite	Amarillo Jara	AJ	Granite	España	0.5219	48	2.5	153.558	16.5465	23.9316	24.8526	3.8732	6.9035	1.07589	1.15546	0.189865	276.87	275.238	275.238	1100.95	24.3371	7.72773	30.8266	283.965	0.24
Granite	Azul Platino	AP	Granite	España	0.486	10.1	1.1	15	61.5517	5.53458	2.607	0.961911	0.724167	0.267197	0.57603	0.221605	257.825	26.886	26.886	107.544	2.37732	0.754867	3.01123	27.7385	0.0505
Granite	Gran Beige	GB	Granite	España	0.59069	40.5	1.75	24.3478	45.2391	8.78943	3.48166	1.25686	0.967129	0.349128	0.191848	0.0697504	313.363	43.641	43.641	174.564	3.85883	1.22529	4.8878	45.0249	0.2025
Granite	Gris Quintana	GQ	Granite	España	0.50041	66.5	2	853.642	5.99167	50.8454	144.091	8.58247	40.0252	2.38402	4.83548	0.322649	265.469	1530.07	1530.07	6120.27	135.292	42.959	171.368	1578.59	0.3325
Granite	Rosa Alba	RA	Granite	España	0.6054	36.1	1.9	63.75	36.175	19.8982	8.89455	2.77624	2.47071	0.771177	0.549847	0.174045	321.167	114.266	114.266	457.062	10.1036	3.20818	12.7977	117.889	0.1805
Granite	Silver Fantasy	SF	Granite	España	0.5736	20.3	1.8	23.493	45.8169	8.67982	3.45951	1.27817	0.960976	0.355047	0.380315	0.144503	304.297	42.1088	42.1088	168.435	3.72335	1.18227	4.71618	43.444	0.1015
Granite	Granite-5	GRA5	Granite	Portugal	0.5407	57.1	3.5	77.4578	22.6265	16.6091	12.1003	2.59463	3.36119	0.72073	0.472916	0.105468	286.844	138.835	138.835	555.342	12.2761	3.89802	15.5496	143.238	0.2855
Granite	Granite-8	GRA8	Granite	Portugal	0.4639	53.9	2.8	99.9167	19.1667	22.8448	18.1928	4.15958	5.05356	1.15544	0.753245	0.17661	246.101	179.091	179.091	716.363	15.8356	5.02825	20.0582	184.77	0.2695
Granite	Granito-Cylinder	GRAC	Granite	Portugal	0.3702	124	6.8	269.028	11.1549	32.6789	61.3829	7.45621	17.0508	2.07117	1.10472	0.147232	196.393	482.206	482.206	1928.82	42.6377	13.5387	54.0071	497.497	0.62
Ceramic	Tile 1	AZLC	Ceramic	España	0.4302	79.7	4.6	29.7324	36.0986	9.06635	5.83775	1.78012	1.6216	0.494477	0.16346	0.0507293	228.223	53.2923	53.2923	213.169	4.71222	1.49627	5.96874	54.9822	0.3985
Ceramic	Tile 2	CER1	Ceramic	España	0.59163	53.15	2.8	10.6102	62.3729	4.59391	1.51481	0.655872	0.420781	0.182187	0.0636034	0.0277416	313.862	19.0177	19.0177	76.0707	1.68158	0.533951	2.12998	19.6207	0.26575
Ceramic	Uni Ouro - PP99	CER6	Ceramic	España	0.587	3.1	1.1	10.7538	65.1846	4.06214	1.54743	0.584525	0.429843	0.162368	1.11397	0.577332	311.406	19.2752	19.2752	77.1008	1.70435	0.541181	2.15882	19.8864	0.0155
Ceramic	Uni GELO - PG2	PP99	Ceramic	Portugal	0.5969	37.5	3.6	11.0192	65.7308	4.57825	1.55932	0.647865	0.433145	0.179963	0.0927961	0.0395706	316.658	19.7509	19.7509	79.0035	1.74641	0.554537	2.2121	20.3772	0.1875
Ceramic	Uni Estanho - PG52	PG2	Ceramic	Portugal	0.6163	72.1	6.2	10.8333	65.7833	3.95811	1.48476	0.542478	0.412433	0.150688	0.0459564	0.0172496	326.95	19.4177	19.4177	77.6707	1.71695	0.545181	2.17478	20.0334	0.3605
Ceramic	Uni Estanho - PC52	PG52	Ceramic	Portugal	0.5386	24.2	2.5	9.69444	68.0278	4.09054	1.52035	0.641506	0.422319	0.178196	0.140201	0.0609048	285.729	17.3763	17.3763	69.5053	1.53645	0.487867	1.94615	17.9273	0.121			Legend
Ceramic	Tile 3	PC52	Ceramic	Portugal	0.4442	29.3	3.2	11.5556	61.4167	5.19992	2.19735	0.98879	0.610374	0.274664	0.167362	0.0774979	235.65	20.7122	20.7122	82.8487	1.83142	0.581527	2.31976	21.369	0.1465			E	Exhalation				Ia	Alpha index (not used)
Wood	Wood	ARE	Aggregate	España	0.57569	41.25	2.4	534.854	8.07292	42.0936	78.4753	6.17609	21.7987	1.71558	4.24555	0.415522	305.406	958.673	958.673	3834.69	84.7679	26.9162	107.371	989.072	0.20625			e	Emanation
Aggregate	Arena de obra	TIJ	Aggregate	Portugal	0.2925	53.8	2.8	44.7742	28.7097	12.2555	12.9297	3.5391	3.59158	0.983084	0.536329	0.149433	155.172	80.2533	80.2533	321.013	7.09617	2.25324	8.98837	82.7981	0.269			eE	Exhalation error
Aggregate	Tijolo	CORE	Wood	España	0.08843	0.6	0.3	8.19608	68.2549	3.03987	7.82876	2.90363	2.17465	0.806564	29.1183	18.1275	46.9125	14.6907	14.6907	58.7626	1.29898	0.412463	1.64535	15.1565	0.003			aTh	Th-226 activity
Zircon	Oxide	CO	Zircon	Portugal	0.2867	1.6	8.8	23.3929	44.4286	9.39377	6.89195	2.76757	1.91443	0.768769	9.61273	53.0108	152.095	41.9294	41.9294	167.717	3.70748	1.17723	4.69609	43.2589	0.008			eTh	Th-226 error
Zircon	Silacate	CS	Zircon	Portugal	0.3547	676	43	1386.71	5.03529	98.0135	330.225	23.3405	91.7291	6.48348	1.09015	0.103662	188.17	2485.53	2485.53	9942.13	219.776	69.7852	278.38	2564.35	3.38			d	density
Plastic cement	Plastic cement	AGPLA	Gypsum	España	0.29055	1.1	1.1	10.069	68.9655	3.86311	2.92719	1.12306	0.813107	0.311961	5.93858	6.36066	154.138	18.0476	18.0476	72.1905	1.59581	0.506715	2.02133	18.6199	0.0055			CTn	Thoron concentration
Gypsum	Gypsum	YESO	Gypsum	España	0.25758	1.4	1.4	7.69231	68.1538	2.52932	2.5225	0.829425	0.700694	0.230396	4.02094	4.23273	136.647	13.7877	13.7877	55.1508	1.21914	0.387111	1.54422	14.2249	0.007			D	Dose
